# Supplementary material
Source: JCI journal article supplement (doi:10.1172/jci166688)
Supplement: sd1 [file 1]

# Supplemental Material

Protein phosphatase PPM1A inhibition attenuates osteoarthritis *via* regulating TGF- $\beta$ /Smad2 signaling in chondrocytes

Qinwen Ge<sup>1,2</sup>, Zhenyu Shi<sup>1,3</sup>, Kai-ao Zou<sup>1,2</sup>, Jun Ying<sup>1,3</sup>, Jiali Chen<sup>1</sup>, Wenhua Yuan<sup>1</sup>, Weidong Wang<sup>1,4</sup>, Luwei Xiao<sup>1</sup>, Xia Lin<sup>5</sup>, Di Chen<sup>6</sup>, Xinhua Feng<sup>7,\*</sup>, Ping-er Wang<sup>1,\*</sup>, Peijian Tong<sup>1,3,\*</sup>, Hongting Jin<sup>1,8,\*</sup>

## List of Contents

**Supplementary Figure 1.** DMM operation induce PPM1A expression in articular cartilage rather than subchondral bone or synovium.

**Supplementary Figure 2.** Comparison of skeletal development between WT and PPM1A-KO postnatal mice.

**Supplementary Figure 3.** PPM1A-KO mice presented normal cartilage homeostasis in adulthood.

**Supplementary Figure 4.** PPM1A-KO mice exhibited less osteophyte formation but no effect on synovitis in response to DMM surgery.

**Supplementary Figure 5.** Intra-articular injection of PPM1A inhibitor displayed no therapeutic effect on OA synovitis.

**Supplementary Table 1.** Primers sequence for RT-qPCR.

**Supplementary Table 2.** Primers sequence for *PPM1A* genotyping.

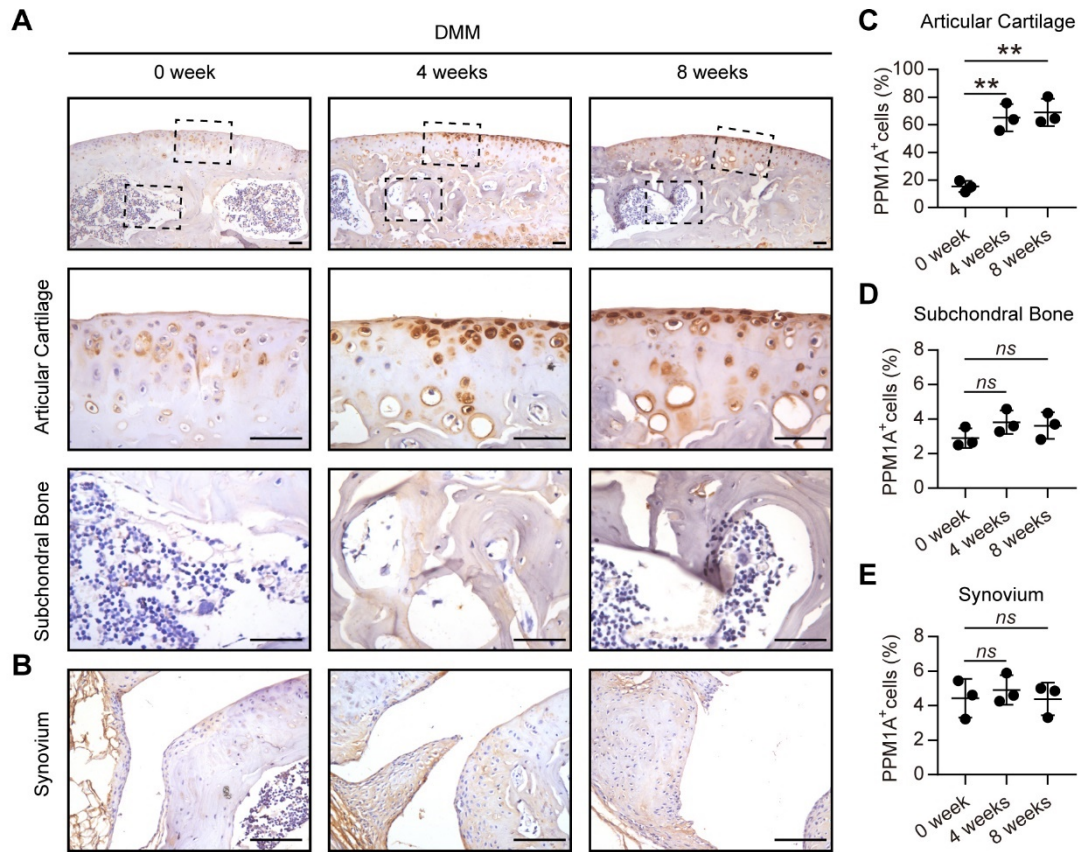

24

25 **Supplementary Figure 1. DMM operation induce PPM1A expression in articular cartilage**

26 **rather than subchondral bone or synovium. (A)** Representative immunohistochemical

27 staining for PPM1A in articular cartilage and subchondral bone area at 0 week, 4 weeks, and 8

28 weeks post DMM initiation. Scale bar = 50  $\mu$ m. **(B)** Representative immunohistochemical

29 staining for PPM1A in synovium tissue at 0 week, 4 weeks, and 8 weeks after DMM surgery.

30 Scale bar = 100  $\mu$ m. **(C-E)** Quantitative data of PPM1A positive cells in articular cartilage (C),

31 subchondral bone (D), and synovium (E) at different timepoints. Data were presented as means

32  $\pm$  S.D., n = 5 mice at per timepoint, \*\* =  $P < 0.01$  and ns = no significance by one-way ANOVA

33 with Dunnett's *t*-test.

34

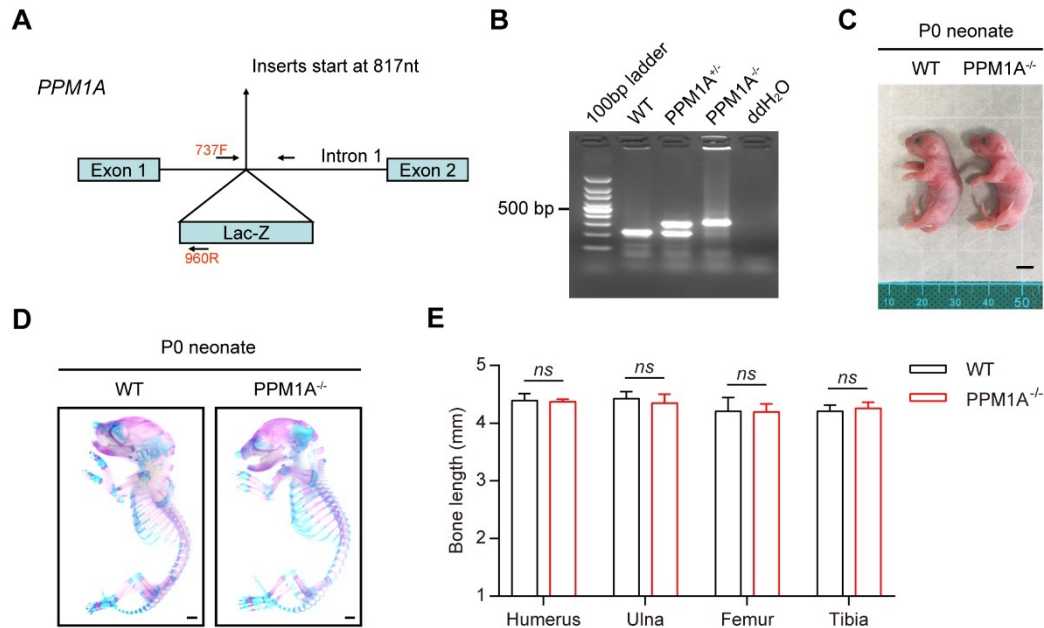

35

36 **Supplementary Figure 2. Comparison of skeletal development between WT and PPM1A-**

37 **KO postnatal mice. (A)** The schematic diagram of generation of PPM1A-KO mouse. **(B)**

38 Genotyping for WT, PPM1A<sup>+/-</sup>, and PPM1A<sup>-/-</sup> mice. KO band = 300~400 bp, WT band = 200~300

39 bp. **(C)** Gross appearance of WT and PPM1A-KO postnatal mice at day 0 (P0). Scale bar = 5

40 mm. **(D)** Representative images of whole skeleton staining with Alizarin red and Alcian blue of

41 WT and PPM1A<sup>-/-</sup> mice at P0. Scale bar = 1 mm. **(E)** Quantitative data of long bone length of

42 WT and PPM1A-KO mice at P0. All the data were presented as means ± S.D., n = 3 pups per

43 group, *ns* = no significance by unpaired parametric Student's *t* test.

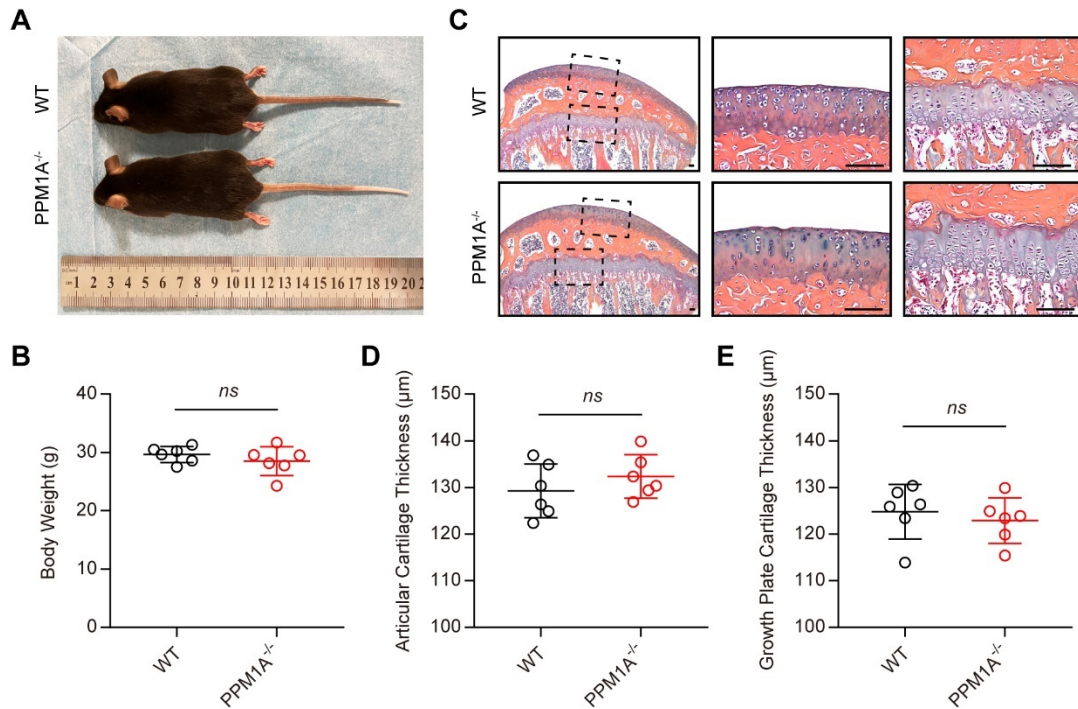

44

45 **Supplementary Figure 3. PPM1A-KO mice presented normal cartilage homeostasis in**

46 **adulthood. (A)** Gross appearance of male WT and PPM1A-KO mice at 3-month-old. Scale bar

47 = 5 mm. **(B)** Quantification of body weight for male WT and PPM1A-KO mice at 3-month-old.

48 **(C)** ABH/OG staining for both tibial articular cartilage and growth plate from WT and PPM1A<sup>-/-</sup>

49 mice at 3-month-old. **(D and E)** Quantification of articular cartilage thickness (D) and growth

50 plate cartilage thickness (E). Data were presented as means ± S.D., n = 6 mice per group. *ns*

51 = no significance by unpaired parametric Student's *t* test.

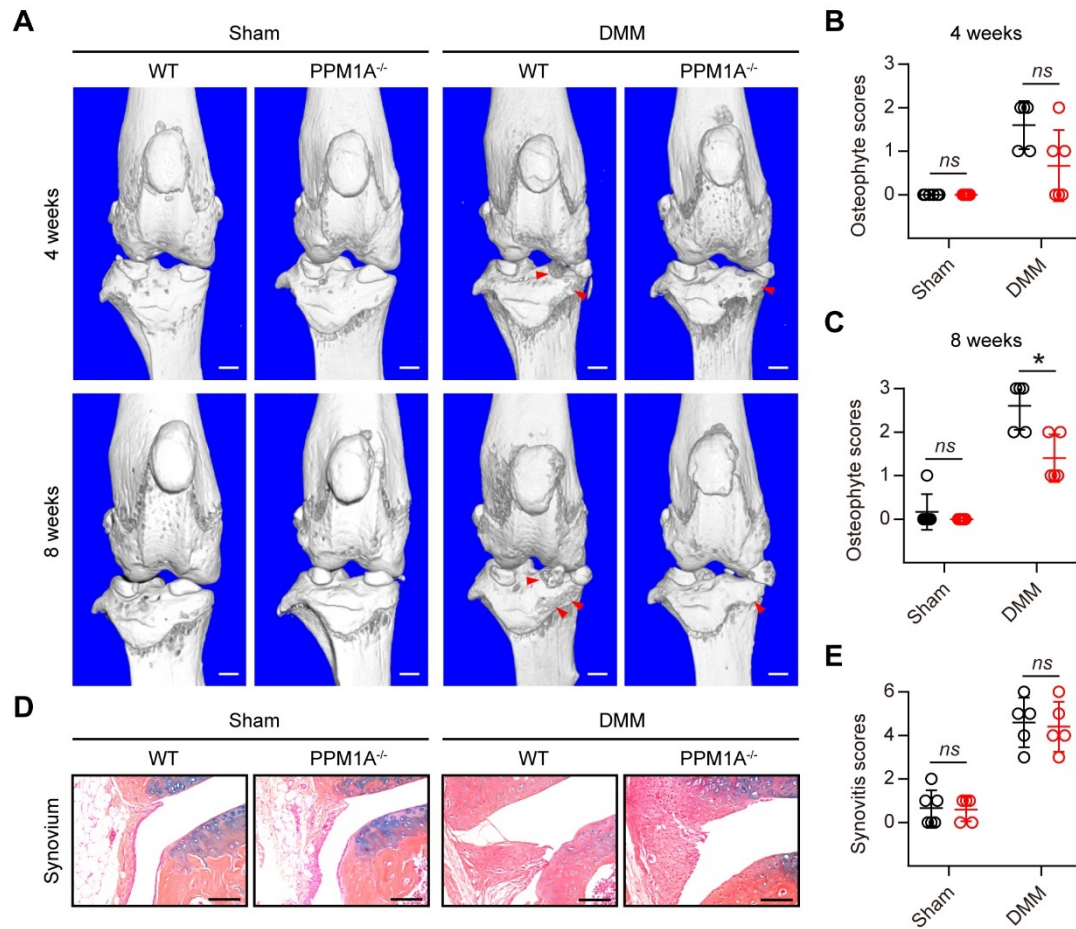

52

53 **Supplementary Figure 4. PPM1A-KO mice exhibited less osteophyte formation but no**  
 54 **effect on synovitis in response to DMM surgery. (A)** Representative images of 3D  
 55 reconstruction for knee joint after sham or DMM surgery at 4 weeks and 8 weeks. Red arrows  
 56 indicated osteophyte. Scale bar = 1 mm. **(B and C)** Quantification of osteophyte scores for  
 57 gross knee joint at 4 weeks (B) and 8 weeks (C) after operation. **(D)** Representative ABH/OG-  
 58 stained sections of anterior synovium from WT and PPM1A<sup>-/-</sup> mice at 8 weeks after sham or  
 59 DMM surgery. Scale bar = 100  $\mu$ m. **(E)** Synovitis scores for assessment of the severity of both  
 60 synovial hyperplasia and synovial inflammation at 8 weeks after surgery. Data were presented  
 61 as means  $\pm$  S.D.,  $n \geq 5$  mice per group. \* =  $P < 0.05$  and *ns* = no significance by two-way  
 62 ANOVA with Sidak's test.

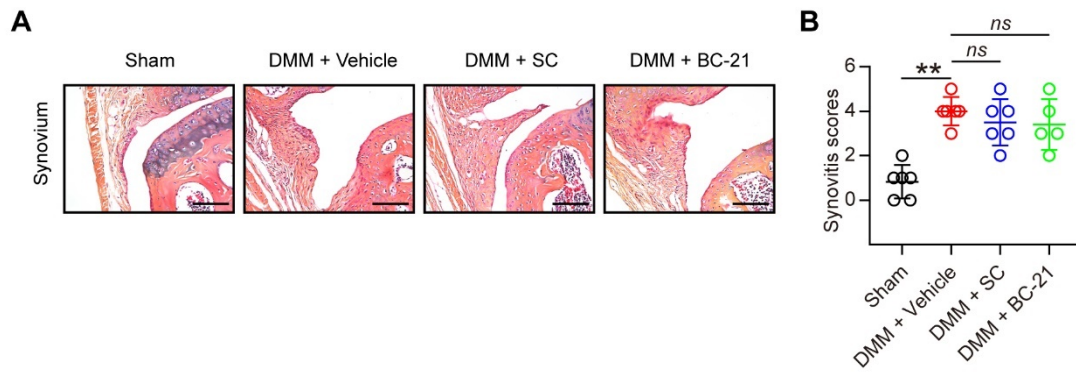

63

64 **Supplementary Figure 5. Intra-articular injection of PPM1A inhibitor displayed no**

65 **therapeutic effect on OA synovitis. (A)** Representative ABH/OG staining images of anterior

66 synovium from mice treated with vehicle or PPM1A inhibitor at 8 weeks after sham or DMM

67 surgery. Scale bar = 100  $\mu$ m. **(B)** Synovitis scores for assessment of the severity of both

68 synovial hyperplasia and synovial inflammation at 8 weeks after surgery. Data were presented

69 as means  $\pm$  S.D., \*\* =  $P < 0.01$  and ns = no significance by one-way ANOVA with Dunnett's *t*-

70 test.

71

72 **Table S1.** Primers sequence for RT-qPCR.

| Gene           | Primer sequences                        | Origin |
|----------------|-----------------------------------------|--------|
| <i>PPM1A</i>   | Forward: 5'-GGACAAGTACCTGGAGAGCAGA-3'   | Mus    |
|                | Reverse: 5'-GGGATGTTCTCACTGGCTAACG-3'   | Mus    |
| <i>β-actin</i> | Forward: 5'-GGAGATTACTGCCCTGGCTCCTA-3'  | Mus    |
|                | Reverse: 5'-GACTCATCGTACTCCTGCTTGCTG-3' | Mus    |

73

74 **Table S2.** Primers sequence for *PPM1A* genotyping.

|          | Primer sequences            |
|----------|-----------------------------|
| Primer 1 | 5'-GGCTGAAGCCTGAGAAGGTTC-3' |
| Primer 2 | 5'-TCCTCCAGGCAAGTTACAAGC-3' |
| Primer 3 | 5'-ATCCTCTGCATGGTCAGGTC-3'  |
| Primer 4 | 5'-CGTGGCCTGATTCATTCC-3'    |

75

76
